# Supplementary material for: Comparative Phospho- and Acetyl Proteomics Analysis of Posttranslational Modifications Regulating Intestine Regeneration in Sea Cucumbers
Source: Front Physiol. 2018 Jul 3;9:836. doi: 10.3389/fphys.2018.00836 (PMC6037860; doi:10.3389/fphys.2018.00836)
Supplement: Data Sheet 2 — All acetylated proteins during intestine regeneration in sea cucumbers. [file Data_Sheet_2.XLSX]

## Sheet: Sheet1
Protein accession	Amino acid	Protein description (Nr database)	Modified sequence	3dpe/con Ratio	3dpe/con P value	Regulated Type	Motif Logo
CL11595.Contig1_All	S	tyrosine kinase receptor Cad96Ca-like	IEAISIQS(0.958)S(0.042)K	0.581	0.00436092	Down
CL11928.Contig1_All	S	peroxisomal sarcosine oxidase-like	KNS(1)EPAIIEK	0.201	0.00292219	Down	...RK.S......
CL11977.Contig3_All	S	eukaryotic translation initiation factor 4E binding protein	DASQMPHEY(0.027)S(0.066)T(0.338)T(0.338)PGGT(0.372)MFS(0.546)T(0.156)T(0.156)PGGT(0.001)R	0.659	0.00991901	Down
CL1978.Contig3_All	S	hypothetical protein BRAFLDRAFT_125373	AAS(0.952)PS(0.046)DS(0.002)ISSHGSSK	0.615	0.0262212	Down	...R..SP.....
CL2222.Contig6_All	Y	focal adhesion kinase	LLHDHSY(0.075)Y(0.925)K	0.643	0.0238834	Down
CL2397.Contig1_All	S	ATP-binding cassette sub-family D member 3-like	RKS(1)T(1)FADLK	0.463	0.0435759	Down	...KR.S......
CL2946.Contig4_All	S	arginyl-tRNA--protein transferase 1-like	GPGPQDKPS(0.014)S(0.014)PRS(0.971)PLS(0.001)PR	0.627	0.00545687	Down	....P.SP.....
CL3144.Contig1_All	S	oxysterol-binding protein-related protein 11-like, partial	YS(0.012)S(0.976)S(0.011)ESIGGR	0.635	0.0401026	Down	...K..S......
CL3336.Contig1_All	S	formin-binding protein 1-like isoform 2	IAPQTTPQT(0.002)T(0.004)PQKVS(0.939)PS(0.053)HS(0.001)SS(0.001)GR	0.61	0.00138331	Down	......SP.....
CL3382.Contig2_All	Y	tyrosine-protein kinase HTK16-like	ATGANNDY(0.004)Y(0.996)R	0.502	0.00635538	Down
CL4040.Contig2_All	S	uncharacterized protein LOC100891869	RGS(1)DGENRPLQTSPGAR	0.56	0.0105796	Down	...RR.S......
CL4987.Contig2_All	S	catalase	LT(0.012)T(0.042)S(0.502)S(0.445)GCPIDDKLAVQTVGER	0.624	0.00899747	Down	..R...S......
CL5788.Contig1_All	S	dystrophin-like protein	VES(0.008)PIKS(0.992)LER	0.637	0.00906206	Down
CL6145.Contig1_All	Y	LOW QUALITY PROTEIN: tyrosine-protein kinase Tec-like	YVLDDQY(1)TSSGAR	0.561	0.031853	Down
CL726.Contig2_All	S	uncharacterized protein LOC578336	AT(0.008)RPIS(0.881)GS(0.112)ENR	0.564	0.00167883	Down	...R..S......
CL8872.Contig1_All	Y	proto-oncogene tyrosine-protein kinase Src	LVKDDHY(1)LAR	0.467	0.0157586	Down
CL9147.Contig2_All	S		RQS(0.915)T(0.078)ES(0.007)GIGLSK	0.282	0.0122536	Down	...RR.S......
CL9595.Contig1_All	S	titin-like	SYPDS(0.009)S(0.008)NVRQS(0.965)PS(0.013)S(0.003)HTR	0.553	0.00055145	Down	......SP.....
CL9595.Contig1_All	S	titin-like	RGPADS(1)PIGR	0.561	0.000233132	Down	......SP.....
CL9595.Contig1_All	Y	titin-like	RTES(0.002)PS(0.003)Y(0.995)R	0.627	0.00888552	Down
CL9595.Contig3_All	S	titin-like	Y(0.007)HDDDRS(0.986)Y(0.007)DR	0.599	0.00379352	Down	.....RS......
Unigene11628_All	S	enhancer of filamentation 1-like isoform 1	T(0.001)DVFGS(0.999)PK	0.628	0.00650527	Down	......SPK....
Unigene11693_All	S	DEP domain-containing mTOR-interacting protein-like	KIS(0.883)T(0.11)VS(0.007)LGSK	0.624	0.00923945	Down
Unigene11872_All	S	uncharacterized protein LOC100888701	QTMLMTQT(0.002)S(0.998)WDGSR	0.491	0.0108537	Down
Unigene13344_All	Y		ALHT(0.001)QKDY(0.987)PS(0.009)FAPLGPT(0.002)DDS(0.002)R	0.582	0.004221	Down
Unigene13550_All	S	tubulin alpha-1B chain-like	S(0.999)IQFVDWCPT(0.001)GFK	0.517	0.0242819	Down	.....RS......
Unigene144_All	S	uncharacterized protein LOC100892576	QYHS(0.996)QES(0.003)LAR	0.587	0.0245607	Down
Unigene21949_All	S	uncharacterized protein LOC575620	SLAT(0.009)LS(0.991)PR	0.638	0.0354653	Down	......SP.....
Unigene26560_All	Y	ribosomal protein S10-like	GPSGPVDSQRDS(0.118)Y(0.882)R	0.637	0.0320804	Down
Unigene28182_All	S	corticotropin-releasing factor receptor 1-like	AHGS(0.993)VVT(0.005)T(0.001)TTDVR	0.641	0.0320316	Down	.....GS......
Unigene28955_All	Y	uncharacterized protein LOC100889419	KVS(0.168)GAT(0.006)Y(0.82)S(0.006)DANHNKR	0.593	0.0230614	Down
Unigene29548_All	S	NADH-cytochrome b5 reductase-like	S(0.01)MDY(0.021)T(0.01)S(0.011)CVLDS(0.013)IQAVS(0.645)T(0.645)DT(0.645)FK	0.645	0.0282636	Down
Unigene29548_All	T	NADH-cytochrome b5 reductase-like	S(0.01)MDY(0.021)T(0.01)S(0.011)CVLDS(0.013)IQAVS(0.645)T(0.645)DT(0.645)FK	0.645	0.0282636	Down
Unigene29548_All	T	NADH-cytochrome b5 reductase-like	S(0.01)MDY(0.021)T(0.01)S(0.011)CVLDS(0.013)IQAVS(0.645)T(0.645)DT(0.645)FK	0.645	0.0282636	Down
Unigene32568_All	S	TBC1 domain family member 1-like	KHY(0.006)S(0.994)CEDQLDR	0.591	0.0215148	Down	...K..S......
Unigene34725_All	S	laminin subunit alpha-like	QDPT(0.107)VT(0.318)RRY(0.294)Y(0.294)Y(0.482)S(0.506)IK	0.51	0.00359975	Down	..R...S......
Unigene778_All	S		AVGEKS(0.947)PLT(0.05)S(0.003)PK	0.663	0.0261903	Down	......SP.....
Unigene9348_All	S	sterile alpha and TIR motif-containing protein 1-like	VFDS(0.948)PT(0.052)RPK	0.615	0.0458912	Down	..R...SP.....
CL10153.Contig2_All	Y	extracellular signal-regulated protein kinase	IADPDHDHTGFLT(0.001)EY(0.998)VAT(0.002)R	0.754	0.00777429
CL10262.Contig2_All	S	uncharacterized protein LOC591219	Y(0.025)FDS(0.943)GDY(0.031)QMAK	0.756	0.0473305
CL10847.Contig3_All	S	uncharacterized protein LOC582503 isoform 1	RS(0.01)DS(0.99)PVVK	0.742	0.000529606		...R..SP.....
CL11977.Contig3_All	S	eukaryotic translation initiation factor 4E binding protein	VTEANAS(0.047)GS(0.699)REIPT(0.254)RR	0.73	0.0416323		.....GS......
CL2131.Contig2_All	T	CNG-modulin	ISPT(0.069)T(0.927)PET(0.004)K	0.679	0.0492863		......TP.....
CL2322.Contig3_All	T	Leucine-rich repeat-containing protein 16A	VAT(0.014)PS(0.014)T(0.046)S(0.053)AAPT(0.864)PT(0.009)KR	0.716	0.00170117		......TP.....
CL356.Contig1_All	S	uncharacterized protein LOC574607	AY(0.002)RHS(0.997)VEY(0.001)ESPSHIR	0.762	0.0156464		....R.S......
CL6721.Contig2_All	S	probable pyruvate dehydrogenase E1 component subunit alpha, mitochondrial-like	YHGHS(0.998)MS(0.001)DPGTSY(0.001)R	0.71	0.00597416
CL6981.Contig3_All	S	actin-binding LIM protein 1-like	T(0.187)GS(0.811)LPMS(0.002)SR	0.747	0.0317018		...K..S......
CL9595.Contig1_All	S	titin-like	SSMDGEEY(0.004)RHS(0.99)PS(0.006)R	0.67	0.00401184		......SP.....
CL9595.Contig1_All	S	titin-like	EGVS(1)PLPPGVK	0.751	0.0465129		..R...SP.....
CL9595.Contig1_All	S	titin-like	IHGT(0.015)S(0.974)PT(0.011)PK	0.748	0.00424948		......SP.....
CL9595.Contig1_All	S	titin-like	RT(0.002)ES(0.967)PS(0.021)Y(0.01)R	0.766	0.0147519		...R..SP.....
CL9595.Contig1_All	S	titin-like	GRES(0.984)PSY(0.016)R	0.703	0.0277931		..R...SP.....
CL9595.Contig1_All	Y	titin-like	GRES(0.023)PSY(0.977)R	0.703	0.00521837
Unigene11628_All	S	enhancer of filamentation 1-like isoform 1	T(0.162)YS(0.837)QDVYDVPTHSISHTK	0.714	0.00543508		...K..S......
Unigene11817_All	S	glycogen synthase, putative-like	Y(0.013)PRPPS(0.036)APPS(0.936)PS(0.011)S(0.003)S(0.001)R	0.677	0.0331168		....P.SP.....
Unigene11994_All	S	hypothetical protein BRAFLDRAFT_115687	WDHIEVS(1)DDEDETHPNVDTPSLFR	0.699	0.00255159		......SD.....
Unigene14207_All	S	ryanodine receptor	S(0.068)T(0.068)S(0.83)MDAGT(0.035)VLKDDGSTR	0.754	0.0106647		...K..S......
Unigene14385_All	S		QLDQLPVSS(0.007)WT(0.111)GS(0.883)LPR	0.741	0.0380521		.....GS......
Unigene15286_All	T	uncharacterized protein LOC100893707	S(0.018)RHT(0.982)LDGSIR	0.741	0.0485928		....R.T......
Unigene19153_All	S	probable E3 ubiquitin-protein ligase MYCBP2-like, partial	SQFTIGSGEGS(1)PK	0.723	0.0342207		......SPK....
Unigene25530_All	S	uncharacterized protein LOC100888759	PAPFVS(1)PK	0.742	0.0332229		......SPK....
Unigene25607_All	S		T(0.006)DS(0.022)HRLS(0.854)GGS(0.02)DY(0.097)DNVK	0.723	0.00692582		....R.S......
Unigene26065_All	S	dachshund homolog 1-like	S(0.227)S(0.768)PS(0.004)NPDS(0.001)MSFHR	0.709	0.0491232		......SP.....
Unigene26560_All	S	ribosomal protein S10-like	GPSGPVDSQRDS(1)YRR	0.73	0.0405949		....R.S......
Unigene30089_All	S	protein SZT2-like, partial	RIS(1)REEPK	0.697	0.00885874		...KR.S......
Unigene30218_All	S	uncharacterized protein LOC100892344 isoform 1	ASSPLGPS(0.004)S(0.009)PT(0.274)EKS(0.713)R	0.74	0.00812635
Unigene32568_All	Y	TBC1 domain family member 1-like	KHY(0.956)S(0.044)CEDQLDR	0.703	0.0487929
Unigene34216_All	S	uncharacterized protein LOC587668	RLS(1)QEINQR	0.67	0.00143841		...RR.S......
Unigene3702_All	S	caspase 8	VKDGKDS(1)PEPMEADQNMR	0.707	0.0280276		......SP.....
Unigene4364_All	S	actin related protein 2/3 complex subunit 5-like	VLTDRMS(1)I	0.683	0.00803035
Unigene6460_All	S	uncharacterized protein LOC592010	T(0.012)LS(0.988)APGGFDNPSK	0.718	0.030696		...R..S......
Unigene7988_All	S	pumilio homolog 1	RDS(0.995)FS(0.003)GATGEY(0.001)K	0.743	0.0415933		...RR.S......
Unigene8094_All	S	uncharacterized protein LOC752284 isoform 1	S(0.002)HS(0.998)DAASYR	0.714	0.042898		...R..S......
Unigene8339_All	S	uncharacterized protein LOC591389	GSLS(0.038)QPS(0.81)PT(0.152)HGR	0.762	0.0422131		......SP.....
CL1056.Contig1_All	S	la-related protein 6-like	SS(0.001)PCQS(0.067)PHGS(0.932)PR	1.361	0.0099459		......SP.....
CL10924.Contig2_All	S	hypothetical protein BRAFLDRAFT_287130	KVT(0.176)S(0.815)DMQT(0.009)HK	1.472	0.0181325		...K..S......
CL1197.Contig13_All	S		KPKEEPTEY(0.001)AT(0.001)VQS(0.997)VIV	1.466	0.026304
CL1293.Contig1_All	S	rCG42105-like isoform 2	VSS(0.001)AAT(0.022)S(0.977)VK	1.398	0.00731674
CL1351.Contig2_All	S	caspase-2-like	LEFEAPDAFAS(1)AR	1.366	0.0314122
CL1509.Contig1_All	S	transcriptional regulator protein-like isoform 1	RLS(1)QSVSLR	1.319	0.00840856		...RR.S......
CL1672.Contig1_All	T	tropomyosin	KLT(0.966)VT(0.034)EEELAR	1.486	0.00630402		...R..T......
CL1927.Contig3_All	S	sodium/potassium ATPase alpha subunit	S(0.96)FKVDNS(0.019)S(0.019)LT(0.003)GESEPQSR	1.307	0.0234699		.....RS......
CL2301.Contig1_All	T	partitioning defective 1	LDT(0.995)FCGS(0.005)PPYAAPELFQGK	1.492	0.0142938
CL2369.Contig1_All	S	glycerophosphodiester phosphodiesterase domain-containing protein 5-like	KT(0.056)T(0.056)S(0.187)S(0.651)PQAS(0.018)DS(0.022)DS(0.01)PVR	1.373	0.0330342		......SP.....
CL2995.Contig3_All	S	alpha-crystallin B chain-like	GY(0.02)FVT(0.016)T(0.05)PS(0.889)RQGLDT(0.025)R	1.474	0.0141571
CL3657.Contig2_All	T		EVLT(1)ILT(1)NR	1.473	0.0297651		..R...T......
CL3657.Contig2_All	T		EVLT(1)ILT(1)NR	1.473	0.0297651
CL4395.Contig2_All	T	B-cell receptor-associated protein 31	KGS(0.021)S(0.021)T(0.021)LS(0.285)DT(0.651)VVAAVADSEVTK	1.364	0.0461769
CL445.Contig1_All	S	ubuiquitin/ribosomal L40 fusion protein	QLEDGRT(0.003)LS(0.997)DYNIQK	1.324	0.00564554		...R..S......
CL4733.Contig2_All	T	RecName: Full=Arginine kinase; Short=AK >gi|4586462|dbj|BAA76385.1| arginine kinase	HFT(0.978)S(0.022)GGMAR	1.478	0.0410893		...R..T......
CL5005.Contig4_All	T	LOW QUALITY PROTEIN: cohesin subunit SA-1-like	LAS(0.392)T(0.6)DS(0.006)S(0.001)VIQPAKR	1.353	0.0188755		..R...T......
CL5050.Contig1_All	S	neuroblast differentiation-associated protein AHNAK-like	GPS(1)LGGGISVDGPK	1.495	0.031164		...K..S......
CL5401.Contig1_All	S	signal recognition particle 14 kDa protein-like	NT(0.081)DRHS(0.834)MS(0.081)EAS(0.004)DHK	1.354	0.0268582		....R.S......
CL5542.Contig1_All	S	uncharacterized protein LOC575058	FT(0.184)S(0.816)PLVDQTIK	1.322	0.0373857		...R..SP.....
CL5628.Contig3_All	T	arfaptin-1-like	T(0.179)GIT(0.676)S(0.144)PNIT(0.002)ENPTVGSR	1.429	0.0297589
CL5967.Contig2_All	S		FGS(0.956)S(0.044)QIMDPLR	1.315	0.0154931		...R..S......
CL817.Contig1_All	S	aftiphilin-like isoform 2	S(0.001)PS(0.04)S(0.959)PLGEGTK	1.341	0.000223376		..R...SP.....
CL8932.Contig1_All	S	myotubularin-related protein 3-like	RAS(1)FVETTSLAR	1.36	0.00851893		...RR.S......
CL9035.Contig4_All	S	girdin isoform 2	S(1)REILTDLR	1.458	0.0183408		.R..S.S......
CL9154.Contig2_All	S	uncharacterized protein LOC581450 isoform 3	LPMHGKGS(1)FIR	1.308	0.0172952		.....GS......
Unigene10008_All	S		GIS(0.914)PS(0.086)REK	1.441	0.00461978		...R..SP.....
Unigene1125_All	S	adenylate kinase domain-containing protein 1 isoform 2	RLPS(1)PDLLPK	1.31	0.0136084		...R..SP.....
Unigene11619_All	S	hypothetical protein BRAFLDRAFT_238017	ETDSPILLS(0.046)KS(0.952)PVT(0.002)EIK	1.352	0.0131582		......SP.....
Unigene11781_All	S	cell division cycle 5-related protein-like	LVLPAPQIS(1)DAEVEEVVK	1.387	0.00373102		......SD.....
Unigene11963_All	S	Retinoblastoma-associated protein	VHPNFT(0.008)VS(0.992)PLR	1.364	0.0355668
Unigene12873_All	S	stathmin-like	VLNS(0.994)PPS(0.006)KDDINVEKR	1.32	0.0489617		......SP.....
Unigene15296_All	S	FERM domain-containing protein 5-like	RS(1)GS(1)FILK	1.499	0.000241457		....R.S......
Unigene15329_All	S	dmX-like protein 2-like	RAS(1)LAAK	1.385	0.00732558		...RR.S......
Unigene15329_All	S	dmX-like protein 2-like	EPT(0.003)GS(0.995)FS(0.002)LFGK	1.405	0.0177199		.....GS......
Unigene15420_All	S	nucleolar protein 5A (56kDa with KKE/D repeat)-like	LISHAGS(1)LTNLAK	1.331	0.0138595		.....GS......
Unigene15592_All	S	uncharacterized protein LOC581773, partial	RQPAPPPVKQPS(1)IEDK	1.428	0.0203744		...K..S......
Unigene16159_All	S	hypothetical protein	ARS(0.989)LT(0.011)HINR	1.315	0.0208737		...K..S......
Unigene16308_All	S		CFS(1)FEDGAALQK	1.437	0.00733809		...R..SF.....
Unigene18552_All	S	partitioning defective 3 homolog	AS(0.147)S(0.853)MDS(1)LLDKPK	1.442	0.0333122		...R..S......
Unigene18552_All	S	partitioning defective 3 homolog	AS(0.147)S(0.853)MDS(1)LLDKPK	1.442	0.0333122		R.....S......
Unigene18648_All	S	hypothetical protein	T(0.002)LS(0.839)T(0.158)GDFSK	1.417	0.0159639		...R..S......
Unigene18648_All	T	hypothetical protein	T(0.013)LS(0.381)T(0.604)GDFS(0.002)KR	1.329	0.0017259		..R...T......
Unigene19488_All	T	uncharacterized protein LOC576037	QY(0.006)T(0.994)LPEDVDIR	1.493	0.00302437		...R..T......
Unigene19871_All	S	hypothetical protein CAPTEDRAFT_146207	INQAGPHS(1)PDGIGYPDER	1.356	0.0155282		....P.SP.....
Unigene21893_All	S	ATPase family AAA domain-containing protein 2-like	RQS(0.608)KFT(0.194)VS(0.194)EDS(0.003)ETPK	1.424	0.008176		...RR.S......
Unigene23612_All	S	cAMP-specific 3&apos;,5&apos;-cyclic phosphodiesterase 4D-like isoform 4	ELS(1)AFSDTGK	1.344	0.0201325		...R..S......
Unigene25475_All	S	insulin-like growth factor 2 mRNA-binding protein 3-like	ES(0.002)VGPIIGLS(0.031)GENIRIS(0.967)AK	1.312	0.0216433		....R.S......
Unigene25997_All	S	protein kinase C delta type-like	VALS(0.777)RT(0.223)DKDFLNSINQK	1.497	0.0157934
Unigene26035_All	S		HKLS(0.942)S(0.048)T(0.011)ENPCPK	1.416	0.00810415
Unigene26035_All	S		HKLS(0.365)S(0.627)T(0.008)ENPCPK	1.409	0.0070122		...K..S......
Unigene26035_All	T		HKLS(0.069)S(0.393)T(0.538)ENPCPK	1.432	0.00413379
Unigene26177_All	S	UV excision repair protein RAD23 homolog B	GQAQFAS(1)MR	1.385	0.0205419
Unigene26195_All	S	protein FAM102A-like	GGSALPSSVGAGS(0.964)S(0.036)GR	1.354	0.000788793		.....GS......
Unigene26561_All	S	Finkel-Biskis-Reilly murine sarcoma virus (FBR-MuSV) ubiquitously expressed (fox derived)	VHGS(1)LAR	1.388	0.0113573		.....GS......
Unigene29435_All	S	KIAA0350 protein-like	RHS(1)AGLK	1.372	0.016798		...RR.S......
Unigene32283_All	S	histone-lysine N-methyltransferase NSD3-like	RT(0.186)S(0.656)T(0.055)S(0.069)T(0.021)T(0.008)T(0.004)GKEPLR	1.457	0.0334338		...RR.S......
Unigene33955_All	S	receptor-type tyrosine-protein phosphatase R-like, partial	RFS(0.523)S(0.279)T(0.108)S(0.089)LT(0.001)LDISGPSDTVR	1.483	0.0257532		...RR.S......
Unigene35416_All	S	protein FAM166B-like	S(1)APANFTLPDNK	1.416	0.0320183		.....RS......
Unigene38861_All	S	PDZ domain-containing protein 8-like	RLS(0.992)S(0.008)SLDYETAK	1.305	0.0173718		...RR.S......
Unigene3974_All	S	probable N-acetyltransferase 8-like	KS(0.086)DS(0.914)LAEIR	1.309	0.0386428		...K..S......
Unigene40825_All	S		NIS(0.684)PT(0.316)LHLK	1.403	0.0443175		......SP.....
Unigene4368_All	T	14-3-3.a protein	NQS(0.344)T(0.656)EACTLAK	1.456	0.0133068		..R...T......
Unigene4769_All	S	uncharacterized protein LOC578100	KNPGT(0.001)ILPT(0.355)S(0.622)PT(0.022)ILQPR	1.327	0.0286543		....P.SP.....
Unigene5164_All	S	uncharacterized protein LOC756386	LPIIVEEVTDHMES(1)I	1.312	0.00128055
Unigene5504_All	S	ubiquitin carboxyl-terminal hydrolase BAP1-like	SGLVT(0.032)S(0.968)PTSK	1.376	0.000456589		......SP.....
Unigene8631_All	S	uncharacterized protein LOC100204546	TSGQSDLRS(1)PGGRPAPDR	1.391	0.0291135		......SP.....
Unigene8875_All	T	chromobox homolog 7	RKT(1)LVLNDHSLER	1.472	0.0121602		...R..T......
Unigene9040_All	S	t-complex protein 11-like protein 1-like	QT(0.079)S(0.92)PKPSPR	1.437	0.00245916		...R..SP.....
CL10416.Contig2_All	S	islet cell autoantigen 1-like isoform 2	LIS(1)LGEDSGQQSQLLAWPSPADGK	1.575	0.0113017	Up	...R..S......
CL10446.Contig2_All	S	RecName: Full=Nucleoplasmin-like protein ANO39; AltName: Full=39 kDa oocyte-expressed nucleolar protein; AltName: Full=Nucleic acid-associated protein 36; AltName: Full=Nucleic acid-binding nuclear protein; Short=NAAP; Short=NAAP1; Short=NAAP2 >gi|6996614|dbj|BAA90827.1| nucleic acid-associated protein 36	KRPS(0.886)S(0.057)T(0.057)NDGPAK	1.933	0.0169562	Up	...KR.S......
CL11778.Contig2_All	T	Golgi reassembly-stacking protein 2-like	S(0.021)FPET(0.953)PVDLS(0.026)QHMK	1.683	0.015111	Up	......TP.....
CL12103.Contig1_All	S	rho guanine nucleotide exchange factor 7-like isoform 1	ELS(0.001)PNT(0.069)LS(0.931)PR	1.514	0.0119792	Up	......SP.....
CL12230.Contig2_All	S	small ubiquitin-related modifier 3	VVGS(0.003)EGS(0.947)T(0.05)VQFK	1.701	0.00574626	Up	.....GS......
CL12471.Contig2_All	S	LOW QUALITY PROTEIN: glucosamine--fructose-6-phosphate aminotransferase	S(0.82)MS(0.173)T(0.007)T(0.001)TFEVAGEAK	2.076	0.0013335	Up	.....RS......
CL12471.Contig2_All	S	LOW QUALITY PROTEIN: glucosamine--fructose-6-phosphate aminotransferase	S(0.046)MS(0.892)T(0.046)T(0.012)T(0.004)FEVAGEAK	1.897	0.00186762	Up	...R..S......
CL12471.Contig2_All	T	LOW QUALITY PROTEIN: glucosamine--fructose-6-phosphate aminotransferase	SMS(0.213)T(0.629)T(0.131)T(0.027)FEVAGEAK	2.036	0.000214981	Up	..R...T......
CL12514.Contig7_All	S	uncharacterized protein LOC100918877	RES(1)GGLLIK	2.391	0.0249593	Up	...RR.S......
CL128.Contig5_All	S	tubulin beta chain-like	AVLVDLEPGTMDS(1)VR	2.224	0.00870716	Up
CL128.Contig5_All	S	tubulin beta chain-like	IMNTY(0.004)S(0.002)VVPS(0.994)PK	2.199	0.0426893	Up	......SPK....
CL128.Contig5_All	S	tubulin beta chain-like	MS(1)MKEVDEQMLNVQNK	1.512	0.00322619	Up	....R.S......
CL1293.Contig1_All	S	rCG42105-like isoform 2	TGAAFT(0.075)S(0.923)FGS(0.002)VVTR	1.513	0.0172277	Up	......SF.....
CL1337.Contig7_All	S	lethal giant larvae homolog 1-like	S(0.965)S(0.035)SENMISLVR	1.564	0.0434673	Up	.....RS......
CL1510.Contig1_All	Y	uncharacterized protein LOC764481	AENELGQQY(1)FLQLR	3.55	0.000698486	Up
CL1732.Contig2_All	S	hypothetical protein BRAFLDRAFT_87417	RGS(1)FGSSK	2.006	0.0064542	Up	...RR.S......
CL2205.Contig3_All	S	ATP-citrate synthase	KPAS(0.998)FMT(0.002)SIVDER	1.558	0.0389425	Up	...K..S......
CL2380.Contig1_All	S	Niemann-Pick type C1 domain-containing protein, putative-like	HPGS(1)KAQLEDVWEK	3.795	0.000602387	Up	.....GS......
CL2542.Contig6_All	S	neural alfa2 tubulin	TIGGGDDSFNTFFS(0.001)ET(0.092)GS(0.907)GK	2.228	0.00414473	Up	.....GS......
CL2850.Contig5_All	S	predicted protein	MSPNETLFLES(0.955)T(0.045)NK	1.968	0.0189128	Up
CL2891.Contig2_All	S	uncharacterized protein LOC591398 isoform 1	S(0.011)T(0.011)PAT(0.091)KS(0.841)PPFAAT(0.046)KPLR	1.507	0.0155522	Up	......SP.....
CL2891.Contig2_All	T	uncharacterized protein LOC591398 isoform 1	ETPS(0.012)VT(0.681)S(0.307)PKEPVLSPK	1.514	0.0114152	Up
CL2946.Contig3_All	S	unconventional myosin-XVI, partial	KGS(1)IAPSIR	1.675	0.00497692	Up	...RK.S......
CL3156.Contig2_All	S	unknown	GNS(1)IILLEALDR	1.584	0.0411458	Up	...R..S......
CL3754.Contig2_All	S	uncharacterized protein LOC582639	T(0.212)KS(0.139)DS(0.647)LLT(0.002)ATFK	1.706	0.0399215	Up	.R..S.S......
CL4083.Contig3_All	S	neuroblast differentiation-associated protein AHNAK-like	LPS(1)GGVEIEKPK	1.672	0.00269572	Up	...K..S......
CL4172.Contig2_All	S	60S acidic ribosomal protein P1	KKES(0.033)S(0.033)DEES(0.933)DDDMGFGLFD	1.735	0.0230696	Up	......SD.....
CL4738.Contig3_All	S	uncharacterized protein LOC592193	NAS(0.93)GS(0.07)QSLLALAAAAEEVQK	2.194	0.0167139	Up	...R..S......
CL4851.Contig3_All	T		KT(0.734)T(0.755)Y(0.476)VNPS(0.035)R	2.261	0.0105455	Up
CL4851.Contig3_All	T		KT(0.734)T(0.755)Y(0.476)VNPS(0.035)R	2.261	0.0105455	Up
CL4894.Contig3_All	S	hypothetical protein	AS(0.81)FS(0.19)AFPRPVER	1.547	0.0165364	Up	....R.S......
CL4911.Contig2_All	S	rRNA 2&apos;-O-methyltransferase fibrillarin-like	VYVEPHRLS(1)GVFIAR	1.794	0.0279653	Up	....R.S......
CL5050.Contig1_All	S	neuroblast differentiation-associated protein AHNAK-like	GPS(1)LKGGADVEIPSGK	2.257	0.00306108	Up
CL5303.Contig3_All	S	peroxiredoxin 6-like	AGGDCMVLPS(1)VKAEDIPALFPK	2.157	0.0308945	Up
CL5462.Contig1_All	S	activator of heat shock 90kDa protein ATPase homolog 1-like	KIS(1)DMGIGVK	2.124	0.0467683	Up	...KK.S......
CL5530.Contig2_All	S	ADP-ribosylation factor GTPase activating protein 2-like	LELYGAVQS(1)PKEK	1.971	0.00303835	Up	......SPK....
CL5683.Contig1_All	T	tumor protein p63-regulated gene 1-like protein-like	IS(0.166)T(0.834)PLPAVVQEGFFAR	2.117	0.0265033	Up	......TP.....
CL5733.Contig2_All	T	calcium/calmodulin-dependent protein kinase (CaM kinase) II delta-like isoform 1	QET(1)VDCLKK	1.802	0.0371857	Up	...R..T......
CL574.Contig3_All	T	sarco/endoplasmic reticulum calcium transporting ATPase	VGEAT(0.965)ET(0.035)ALTVLVEK	2.423	0.0158732	Up
CL5840.Contig2_All	S	glutamine synthetase	GAS(1)IRIPR	3.302	0.00153902	Up	...R..S......
CL5942.Contig1_All	S	PKG	S(0.002)S(0.042)S(0.955)DS(0.001)VESTHMTVR	2.483	0.00128835	Up	...R..S......
CL5942.Contig2_All	T	PKG	T(0.068)WT(0.924)FCGT(0.008)PEYVAPEIILNK	3.49	0.00503391	Up
CL5942.Contig2_All	T	PKG	T(0.037)WT(0.349)FCGT(0.614)PEYVAPEIILNK	4.72	0.00710543	Up	......TP.....
CL609.Contig1_All	S	heterogeneous nuclear ribonucleoprotein U-like protein 1-like	NY(0.019)S(0.002)GRFDS(0.979)LIEK	1.892	0.00820141	Up	...R..S......
CL6103.Contig1_All	S	eukaryotic peptide chain release factor GTP-binding subunit ERF3B isoform 2	T(0.009)VEVGRAS(0.986)FET(0.004)DKK	1.575	0.00416444	Up	....R.S......
CL6111.Contig2_All	S	protein transport protein Sec31A-like isoform 1	RPAGAS(1)FGFGGK	1.749	0.00475252	Up	......SF.....
CL6111.Contig2_All	S	protein transport protein Sec31A-like isoform 1	S(0.209)KS(0.79)LEEALS(0.001)QGQFCEFCDGK	4.286	0.0336101	Up	...R..S......
CL6832.Contig3_All	S	epidermal growth factor receptor substrate 15-like 1-like	DDPFAS(0.911)FS(0.075)S(0.01)S(0.003)S(0.001)K	1.615	0.0136797	Up	......SF.....
CL6893.Contig2_All	T	large neutral amino acids transporter small subunit 4-like isoform 1	KLS(0.256)VT(0.744)DEQAEVAK	1.577	0.0377708	Up
CL7251.Contig2_All	S	TBC1 domain family member 24-like	S(0.26)S(0.737)PQS(0.002)LS(0.001)VPIALR	1.668	0.014818	Up	......SP.....
CL7370.Contig4_All	S	ribosome-binding protein 1-like isoform 2	EKPGKS(1)PR	1.91	0.00474722	Up	......SP.....
CL7651.Contig3_All	S	uncharacterized protein LOC576916	S(0.002)VS(0.998)LVGVAK	2.03	0.0179126	Up	...K..S......
CL8209.Contig2_All	S	acetyl-Coenzyme A acyltransferase 2-like	TPFGAFGGS(1)LK	1.774	0.0220258	Up	.....GS......
CL8221.Contig1_All	S	HeRunt-1	AS(1)PLADPLTK	1.54	0.00411217	Up
CL8221.Contig1_All	S	HeRunt-1	AKS(0.876)PLRGT(0.124)IGHIGER	2.429	0.00453644	Up	......SP.....
CL8386.Contig2_All	S	methylmalonate-semialdehyde dehydrogenase	GS(0.996)FRGDTNFY(0.004)GK	1.937	0.017431	Up	....R.S......
CL859.Contig2_All	S	pre-mRNA-processing-splicing factor 8	AIS(0.995)AT(0.005)NLHLR	1.724	0.0158714	Up	...R..S......
CL9013.Contig2_All	T	plastin 3-like	AFVT(1)PNDIVK	1.505	0.0148967	Up	......TP.....
CL9265.Contig2_All	S	CASP-like transcription factor	LDPFNS(1)FSR	2.454	0.00562536	Up	R.....S......
CL9576.Contig3_All	S	hypothetical protein CAPTEDRAFT_156508	DKKVS(0.933)LT(0.063)ET(0.004)K	1.547	0.0337489	Up	...KK.S......
CL9627.Contig2_All	S	eukaryotic translation initiation factor 4B-like	RKDNVVS(1)PR	1.757	0.0254745	Up	......SP.....
CL9861.Contig1_All	S	protein LTV1 homolog	FTNYS(0.001)LS(0.036)S(0.168)S(0.795)VIR	1.748	0.00192035	Up
Unigene1047_All	S	putative 60S ribosomal protein RPL15	QAMS(1)LRR	1.712	0.0410267	Up
Unigene11830_All	S	protein Njmu-R1-like	ACS(0.91)LS(0.09)DLLQK	1.839	0.0168792	Up	...K..S......
Unigene11883_All	S	protein EFR3 homolog B-like	S(0.194)PVS(0.799)PAGS(0.006)PLRPDPSSPFQFK	1.652	0.0326467	Up	..R...SP.....
Unigene12365_All	S	putative calcium-binding protein p22	FIS(0.994)LDKS(0.006)EAGK	2.775	0.0194612	Up	...R..S......
Unigene12617_All	S	uncharacterized protein LOC100889723	VLS(0.999)VDS(0.001)FDSK	1.735	0.0293437	Up	...R..S......
Unigene12617_All	S	uncharacterized protein LOC100889723	VLS(0.309)VDS(0.652)FDS(0.04)K	1.672	0.0174969	Up	R.....S......
Unigene12777_All	S	anion exchange protein 3-like isoform 2	NIS(0.058)T(0.058)VS(0.019)LGS(0.865)LLR	1.744	0.0206835	Up	.....GS......
Unigene14341_All	S	membrane-associated guanylate kinase, WW and PDZ domain-containing protein 2-like isoform 2	ES(0.026)S(0.187)S(0.771)PT(0.015)HSR	1.635	0.0128043	Up	..R...SP.....
Unigene15296_All	S	FERM domain-containing protein 5-like	RS(1)GS(1)FILK	1.511	0.00152906	Up	...R..SF.....
Unigene15415_All	S	polypeptide N-acetylgalactosaminyltransferase 10-like, partial	AT(0.002)DPVRS(0.998)PIMAGGLFAIDR	1.871	0.0279013	Up	......SP.....
Unigene15621_All	T	uncharacterized protein LOC100890361	TTS(0.001)NEPT(0.764)S(0.233)PLDLSGK	1.594	0.0035974	Up
Unigene16239_All	S	cellular retinoic acid-binding protein 1-like	AALIMPS(0.967)PT(0.033)CEITNPADNAFVIK	1.98	0.00431315	Up	......SP.....
Unigene17347_All	S	uncharacterized protein C9orf135-like	KGS(1)LFLR	2.452	0.0415442	Up	...RK.S......
Unigene18585_All	S	protein C19orf12 homolog	KLS(1)VDGELR	1.541	0.0256809	Up	...RK.S......
Unigene19038_All	S	uncharacterized protein LOC592852	LPS(0.978)VT(0.022)TFHK	2.535	0.00400337	Up	...K..S......
Unigene19245_All	S		LS(0.769)DS(0.23)S(0.001)IQFIEK	1.562	0.0145065	Up	....R.S......
Unigene19488_All	S	uncharacterized protein LOC576037	QAS(1)RVEYDNQK	2.068	0.000641034	Up	...R..S......
Unigene200_All	S	aldehyde dehydrogenase 3 family, member A2	PVPS(1)ELVMGIR	3.812	0.0189138	Up	..R...S......
Unigene20063_All	S	uncharacterized protein LOC100889543 isoform 1	KMS(0.957)S(0.043)VQDTSTR	1.691	0.00440009	Up	...KK.S......
Unigene21911_All	T	spectrin alpha chain, brain-like isoform 2	QET(1)FDAGLQSFEK	2.176	0.043608	Up
Unigene22155_All	S	E3 ubiquitin-protein ligase UBR4, partial	TQATIS(0.002)LAS(0.975)PT(0.019)ERPQS(0.002)S(0.002)QK	1.563	0.0179909	Up	......SP.....
Unigene22228_All	T		QHAT(0.988)Y(0.012)GFER	2.298	0.00190167	Up	..R...T......
Unigene24584_All	T	hypothetical protein	T(0.008)KT(0.037)T(0.955)PPTAPK	1.662	0.0468959	Up	......TPP....
Unigene25579_All	S	heat shock protein 75 kDa, mitochondrial-like	LHS(1)FMEK	1.639	0.0104823	Up	...R..SF.....
Unigene25658_All	S	uncharacterized protein LOC589156 isoform 3	ILS(1)IENLIAADSK	1.512	0.0022993	Up	...R..S......
Unigene25858_All	S	hypothetical protein BRAFLDRAFT_126497	FGGIVAVT(0.001)GS(0.939)T(0.058)T(0.001)DLEAK	1.702	0.0120945	Up	.....GS......
Unigene25997_All	S	protein kinase C delta type-like	FLEREPS(1)KR	1.679	0.00063961	Up	...R..S......
Unigene25997_All	S	protein kinase C delta type-like	T(0.001)DKDFLNS(0.999)INQK	1.575	0.00605518	Up
Unigene26110_All	S	Poly	TQIS(0.009)KES(0.991)LR	1.724	0.0322677	Up
Unigene26110_All	S	Poly	MIQS(1)PHFDGK	1.52	0.00435823	Up	..R...SP.....
Unigene26544_All	S	histone H1.0-like	KLS(0.991)ES(0.009)QVK	1.597	0.000923663	Up	...RK.S......
Unigene270_All	S	protein kinase, cAMP-dependent, catalytic, beta a-like	IKGPGDTSHFDDYEEEPIRIS(0.905)S(0.073)T(0.022)EK	2.227	0.0112541	Up	....R.S......
Unigene27095_All	S	myosin-IIIb-like	TGT(0.001)LALQNRIS(0.999)QK	1.657	0.0115157	Up	....R.S......
Unigene28981_All	S	coatomer subunit delta-like isoform 1	S(0.001)GGFGS(0.082)S(0.918)VR	1.667	0.00456159	Up
Unigene29123_All	T	Tgif, partial	IS(0.158)KT(0.704)PT(0.138)EVDAKR	1.513	0.00821101	Up	......TP.....
Unigene29854_All	Y	high mobility group protein 1 homolog	NLSAFFLY(1)SNDER	1.717	0.0134058	Up
Unigene31197_All	S		RLKS(1)IEK	2.245	0.000604281	Up	...R..S......
Unigene32660_All	S	heterogeneous nuclear ribonucleoprotein K-like	DLAGS(1)IIGTR	1.778	0.0462648	Up	.....GS......
Unigene32797_All	S	uncharacterized protein LOC580680	S(1)VGEGEALEFDVVQGIK	2.481	0.0320093	Up	....R.S......
Unigene32921_All	S	probable thiopurine S-methyltransferase-like	MFAWCS(0.82)S(0.18)IK	2.859	0.0021179	Up	R.....S......
Unigene33503_All	T	60S ribosomal protein L27-like isoform 1	DVFREPT(1)LKK	2.68	0.0135024	Up	...R..T......
Unigene33539_All	S	vesicle transport protein USE1-like	S(0.021)IS(0.979)LPGSK	1.502	0.0218378	Up	...R..S......
Unigene34556_All	S	predicted protein	RVS(1)EKDIK	2.234	0.0010791	Up	...RR.S......
Unigene350_All	S	predicted protein	LQIWDTAGQES(1)FR	2.02	0.0202868	Up	......SF.....
Unigene350_All	S	predicted protein	LQIWDTAGQES(0.065)FRS(0.927)IT(0.007)R	1.582	0.00274765	Up	.....RS......
Unigene3874_All	S	40S ribosomal protein S13	S(1)VPNWLK	1.695	0.00322809	Up	....R.S......
Unigene3880_All	T	Oryzias latipes 14-3-3 protein beta/alpha-1-like	ADT(1)PKVELNPDELAK	1.517	0.0303685	Up	......TP.....
Unigene38861_All	S	PDZ domain-containing protein 8-like	S(0.024)AS(0.434)PS(0.543)RLEVPSNESPVLR	1.941	0.00551907	Up	.R..S.S......
Unigene3942_All	S	suppressor of cytokine signaling 2-like	KGS(1)GQFVWLEPSGR	2.07	0.0135613	Up	...RK.S......
Unigene40277_All	S		KKS(0.799)T(0.201)GADDGFQK	1.876	0.0450703	Up	...KK.S......
Unigene46531_All	S	40S ribosomal protein S27-like isoform 3	LTEGCS(1)FR	1.788	0.00265522	Up
Unigene48670_All	S		KVS(0.893)ILT(0.107)R	2.248	0.00395534	Up	...RK.S......
Unigene5010_All	S	nucleosome assembly protein homologue	LDS(1)LVGQR	1.726	0.00853374	Up	...R..S......
Unigene53143_All	T	Translation initiation factor 2 subunit alpha (AeIF-2a), related	KVHQT(1)VR	1.513	0.0263412	Up
Unigene5410_All	S	hypothetical protein DICPUDRAFT_79541	VGEDLS(0.978)FS(0.022)LPK	1.895	0.0135761	Up	......SF.....
Unigene5928_All	Y	uncharacterized protein ENSP00000372125 homolog	NFS(0.048)HGEGY(0.958)RINS(0.994)PGRR	4.374	0.0478563	Up
Unigene60321_All	S		FS(1)PFNLEIGK	2.826	0.00121478	Up	......SP.....
Unigene638_All	S	microtubule-associated protein RP/EB family member 1	TQIS(1)ELSGELTTAR	1.612	0.0429224	Up
Unigene6985_All	S		S(0.186)S(0.801)T(0.012)LWQTIDIAK	1.884	0.0429593	Up	...RR.S......
Unigene7928_All	S	heterogeneous nuclear ribonucleoprotein A1-like	FGS(0.999)VS(0.001)AVK	1.761	2.30381e-05	Up	...R..S......
Unigene8144_All	S	polyA-binding protein	LFS(1)IIQQSHGDVAGK	1.653	0.00422111	Up	...R..S......
Unigene8444_All	S	disabled homolog 1-like isoform 2	S(0.049)LAS(0.947)PPPT(0.004)VASGDLIFDPQQPK	1.511	0.00668805	Up	......SP.....
Unigene8922_All	S	uncharacterized protein LOC587978	RDS(1)T(1)MKATAEEGAEFLK	2.145	0.0272018	Up	...KR.S......
Unigene8922_All	T	uncharacterized protein LOC587978	RDS(1)T(1)MKATAEEGAEFLK	2.436	0.0240575	Up	...R..T......
Unigene9689_All	S		RRLS(1)IEK	1.566	0.0259853	Up	...RR.S......
